# Supplementary material
Source: HighWire-hosted journal article supplement (https://www.annfammed.org/highwire/filestream/7824/field_highwire_adjunct_files/0/daalemansupp2.pdf)
Supplement: daalemansupp2.pdf [file daalemansupp2.pdf]

**Online Supplementary Material**

Daaleman TP, Perera S, Studenski SA. Religion, spirituality, and health status in geriatric outpatients. *Ann Fam Med* 2004;2:49-53.

<http://www.annfammed.org/cgi/content/full/2/1/49/DC1>

**SUPPLEMENTAL APPENDIX. SPIRITUALITY INDEX OF WELL-BEING**

**Which statement best describes your feelings and choices?**

|                                                                     | <b>Strongly Agree</b> | <b>Agree</b> | <b>Neither Agree nor Disagree</b> | <b>Disagree</b> | <b>Strongly Disagree</b> |
|---------------------------------------------------------------------|-----------------------|--------------|-----------------------------------|-----------------|--------------------------|
|                                                                     | <b>1</b>              | <b>2</b>     | <b>3</b>                          | <b>4</b>        | <b>5</b>                 |
| 1. There is not much I can do to help myself.                       | 1                     | 2            | 3                                 | 4               | 5                        |
| 2. Often, there is no way I can complete what I have started.       | 1                     | 2            | 3                                 | 4               | 5                        |
| 3. I can't begin to understand my problems.                         | 1                     | 2            | 3                                 | 4               | 5                        |
| 4. I am overwhelmed when I have personal difficulties and problems. | 1                     | 2            | 3                                 | 4               | 5                        |
| 5. I don't know how to begin to solve my problems.                  | 1                     | 2            | 3                                 | 4               | 5                        |
| 6. There is not much I can do to make a difference in my life.      | 1                     | 2            | 3                                 | 4               | 5                        |
| 7. I haven't found my life's purpose yet.                           | 1                     | 2            | 3                                 | 4               | 5                        |
| 8. I don't know who I am, where I came from, or where I am going.   | 1                     | 2            | 3                                 | 4               | 5                        |
| 9. I have a lack of purpose in my life.                             | 1                     | 2            | 3                                 | 4               | 5                        |
| 10. In this world, I don't know where I fit in.                     | 1                     | 2            | 3                                 | 4               | 5                        |
| 11. I am far from understanding the meaning of life.                | 1                     | 2            | 3                                 | 4               | 5                        |
| 12. There is a great void in my life at this time.                  | 1                     | 2            | 3                                 | 4               | 5                        |

Copyright 2000 The University of Kansas Medical Center.
